# Supplementary material
Source: MDPI journal article supplement (https://www.mdpi.com/2413-8851/2/2/45)
Supplement: s1 [file s1]

| Smartphone App         | App Availability | Provision Type | Category            | Main Use      | Assistive Feature | Cost-conscious Feature | Language Options | App Download Site                                                                                                                                                                                     | Miscellaneous Notes                              |
|------------------------|------------------|----------------|---------------------|---------------|-------------------|------------------------|------------------|-------------------------------------------------------------------------------------------------------------------------------------------------------------------------------------------------------|--------------------------------------------------|
| abil.io                | Free             | Information    | Navigation          | Accessibility | ✓                 | -                      | -                | <a href="https://itunes.apple.com/us/app/abil.io/id980873789">https://itunes.apple.com/us/app/abil.io/id980873789</a>                                                                                 | Simplified presentation for easy comprehension   |
| Apple Maps             | Free             | Information    | Navigation          | General       | ✓                 | -                      | ✓                | <a href="https://www.apple.com/ios/maps/">https://www.apple.com/ios/maps/</a>                                                                                                                         | Visual impairment, voice from Siri               |
| Ariadne                | Paid             | Information    | Navigation          | Accessibility | ✓                 | -                      | -                | <a href="https://itunes.apple.com/us/app/ariadne-gps/id441063072?mt=8">https://itunes.apple.com/us/app/ariadne-gps/id441063072?mt=8</a>                                                               | Visual impairment                                |
| Arro                   | Free             | Service        | Travel              | General       | -                 | -                      | -                | <a href="https://itunes.apple.com/us/app/arro-your-taxi-your-way/id979943889?mt=8&amp;ign-mpt=uo%3D4">https://itunes.apple.com/us/app/arro-your-taxi-your-way/id979943889?mt=8&amp;ign-mpt=uo%3D4</a> |                                                  |
| BlaBlaCar              | Free             | Service        | Travel              | General       | -                 | ✓                      | ✓                | <a href="https://itunes.apple.com/fr/app/blablacar-trusted-carpooling/id341329033?l=en&amp;mt=8">https://itunes.apple.com/fr/app/blablacar-trusted-carpooling/id341329033?l=en&amp;mt=8</a>           | Peer-to-peer carsharing for long journeys        |
| BlindSquare            | Paid             | Information    | Navigation          | Accessibility | ✓                 | -                      | ✓                | <a href="https://itunes.apple.com/app/blindsquare/id500557255">https://itunes.apple.com/app/blindsquare/id500557255</a>                                                                               | Visual impairment                                |
| BlindWays              | Free             | Information    | Navigation          | Accessibility | ✓                 | -                      | -                | <a href="https://itunes.apple.com/us/app/blindways-bus-stop-navigation/id1146615175?ls=1&amp;mt=8">https://itunes.apple.com/us/app/blindways-bus-stop-navigation/id1146615175?ls=1&amp;mt=8</a>       |                                                  |
| Bridj                  | Free             | Service        | Travel              | General       | -                 | ✓                      | ✓                | <a href="https://itunes.apple.com/us/app/bridj/id938140457?mt=8">https://itunes.apple.com/us/app/bridj/id938140457?mt=8</a>                                                                           | English and Spanish, mass transport              |
| Bus Checker            | Free             | Information    | Maps and navigation | General       | -                 | -                      | ✓                | <a href="https://play.google.com/store/apps/details?id=com.fataatitude.buscheckermta&amp;hl=en">https://play.google.com/store/apps/details?id=com.fataatitude.buscheckermta&amp;hl=en</a>             |                                                  |
| Car2GO                 | Free             | Service        | Travel              | General       | -                 |                        | ✓                | <a href="https://itunes.apple.com/us/app/car2go/id514921710?mt=8">https://itunes.apple.com/us/app/car2go/id514921710?mt=8</a>                                                                         |                                                  |
| Carma                  | Free             | Service        | Travel              | General       | -                 | ✓                      | -                | <a href="https://www.gocarma.com/#section-3">https://www.gocarma.com/#section-3</a>                                                                                                                   | Carpooling, toll discount                        |
| Citymapper             | Free             | Information    | Navigation          | General       | -                 | -                      | ✓                | <a href="https://itunes.apple.com/us/app/citymapper-transit-navigation/id469463298?mt=8">https://itunes.apple.com/us/app/citymapper-transit-navigation/id469463298?mt=8</a>                           |                                                  |
| Curb                   | Free             | Service        | Travel              | General       | ✓                 | -                      | -                | <a href="https://itunes.apple.com/us/app/taxi-magic/id299226386?mt=8">https://itunes.apple.com/us/app/taxi-magic/id299226386?mt=8</a>                                                                 | Wheelchair accessibility in select markets       |
| Flinc                  | Free             | Information    | Travel and local    | General       | -                 | -                      | ✓                | <a href="https://play.google.com/store/apps/details?id=org.flinc.app&amp;hl=en">https://play.google.com/store/apps/details?id=org.flinc.app&amp;hl=en</a>                                             | Peer-to-peer ridesharing                         |
| Flywheel               | Free             | Service        | Travel              | General       | -                 | -                      | -                | <a href="https://play.google.com/store/apps/details?id=com.upstartmobile.Cabulous&amp;hl=en">https://play.google.com/store/apps/details?id=com.upstartmobile.Cabulous&amp;hl=en</a>                   | Taxi app                                         |
| Getaround              | Free             | Service        | Maps and navigation | General       | -                 | -                      | -                | <a href="https://play.google.com/store/apps/details?id=com.getaround.android">https://play.google.com/store/apps/details?id=com.getaround.android</a>                                                 | Car rental                                       |
| Gett                   | Free             | Service        | Travel              | General       | -                 | -                      | ✓                | <a href="https://itunes.apple.com/us/app/gett-car-service-rideshare/id449655162?mt=8">https://itunes.apple.com/us/app/gett-car-service-rideshare/id449655162?mt=8</a>                                 |                                                  |
| Google Maps            | Free             | Information    | Navigation          | General       | ✓                 | -                      | ✓                | <a href="https://support.google.com/maps/answer/3273406?co=GENIE.Platform%3DAndroid&amp;hl=en">https://support.google.com/maps/answer/3273406?co=GENIE.Platform%3DAndroid&amp;hl=en</a>               | Voice direction                                  |
| Gopili – Cheap Tickets | Free             | Information    | Travel              | General       | -                 | ✓                      | ✓                | <a href="https://itunes.apple.com/gb/app/id1056848561">https://itunes.apple.com/gb/app/id1056848561</a>                                                                                               | Finds cheap tickets for longer travels           |
| Guide Dots             | Free             | Information    | Navigation          | Accessibility | ✓                 | -                      | -                | <a href="https://play.google.com/store/apps/details?id=com.vml.guidedots&amp;hl=en">https://play.google.com/store/apps/details?id=com.vml.guidedots&amp;hl=en</a>                                     | Visual impairment, for walking                   |
| Hitcharide             | Free             | Service        | Travel              | General       | -                 | ✓                      | -                | <a href="https://itunes.apple.com/au/app/hitch-ride-real-time-ride/id957294054?mt=8">https://itunes.apple.com/au/app/hitch-ride-real-time-ride/id957294054?mt=8</a>                                   | Community carpooling                             |
| Juno                   | Free             | Service        | Travel              | General       | -                 | -                      | -                | <a href="https://itunes.apple.com/us/app/id1095607448?mt=8">https://itunes.apple.com/us/app/id1095607448?mt=8</a>                                                                                     |                                                  |
| JustShareIt            | Free             | Service        | Travel              | General       | -                 | ✓                      | -                | <a href="https://itunes.apple.com/us/app/justshareit/id545886928?mt=8">https://itunes.apple.com/us/app/justshareit/id545886928?mt=8</a>                                                               | Peer-to-peer carshaing                           |
| Limebike               | Free             | Service        | Travel              | General       | -                 | ✓                      | ✓                | <a href="https://itunes.apple.com/us/app/limebike-your-ride-anytime/id1199780189?mt=8">https://itunes.apple.com/us/app/limebike-your-ride-anytime/id1199780189?mt=8</a>                               |                                                  |
| Live Train Times UK    | Paid             | Information    | Travel              | General       | -                 | -                      | -                | <a href="https://itunes.apple.com/gb/app/live-train-times-uk-national-rail/id438104470?mt=8">https://itunes.apple.com/gb/app/live-train-times-uk-national-rail/id438104470?mt=8</a>                   |                                                  |
| Lyft                   | Free             | Service        | Travel              | General       | ✓                 | ✓                      | -                | <a href="https://help.lyft.com/hc/en-us/articles/213584508-Accessible-vehicle-dispatch">https://help.lyft.com/hc/en-us/articles/213584508-Accessible-vehicle-dispatch</a>                             | Wheelchair accessible feature                    |
| Maps.Me                | Free             | Information    | Navigation          | General       | -                 | -                      | ✓                | <a href="https://itunes.apple.com/us/app/maps-me-offline-map-nav/id510623322?mt=8">https://itunes.apple.com/us/app/maps-me-offline-map-nav/id510623322?mt=8</a>                                       |                                                  |
| Moovit                 | Free             | Information    | Navigation          | General       | ✓                 | -                      | ✓                | <a href="https://itunes.apple.com/us/app/moovit-live-transit-app/id498477945?mt=8">https://itunes.apple.com/us/app/moovit-live-transit-app/id498477945?mt=8</a>                                       | Accessibility info only available on the website |
| MyTransLink            | Free             | Information    | Navigation          | General       | -                 | -                      | -                | <a href="https://itunes.apple.com/ca/app/mytranslink/id927289966?mt=8">https://itunes.apple.com/ca/app/mytranslink/id927289966?mt=8</a>                                                               | Audio and visual announcer                       |

| Smartphone App        | App Availability | Provision Type        | Category            | Main Use      | Assistive Feature | Cost-conscious Feature | Language Options   | App Download Site                                                                                                                                                                                         | Miscellaneous Notes                                                                                                      |
|-----------------------|------------------|-----------------------|---------------------|---------------|-------------------|------------------------|--------------------|-----------------------------------------------------------------------------------------------------------------------------------------------------------------------------------------------------------|--------------------------------------------------------------------------------------------------------------------------|
| Navigon North America | Paid             | Information           | Navigation          | General       | ✓                 | -                      | ✓                  | <a href="https://itunes.apple.com/au/app/mytranslink/id927289966?mt=8">https://itunes.apple.com/au/app/mytranslink/id927289966?mt=8</a>                                                                   | Visual impairment                                                                                                        |
| Nearby Explorer       | Paid             | Information           | Navigation          | Accessibility | ✓                 | -                      | ✓                  | <a href="https://itunes.apple.com/ca/app/nearby-explorer/id1095698497?mt=8">https://itunes.apple.com/ca/app/nearby-explorer/id1095698497?mt=8</a>                                                         | English and German                                                                                                       |
| Netlift               | Free             | Service               | Navigation          | General       | -                 | ✓                      | ✓                  | <a href="https://itunes.apple.com/ca/app/netlift/id546174951?mt=8">https://itunes.apple.com/ca/app/netlift/id546174951?mt=8</a>                                                                           | English and French                                                                                                       |
| OneBusWay             | Free             | Information           | Navigation          | General       | -                 | -                      | ✓                  | <a href="https://itunes.apple.com/ca/app/onebusaway/id329380089?mt=8">https://itunes.apple.com/ca/app/onebusaway/id329380089?mt=8</a>                                                                     |                                                                                                                          |
| Ridejoy               | Free             | Service               | Travel              | General       | -                 | -                      | ✓                  | <a href="https://itunes.apple.com/us/app/joy-ride-taxi-app/id1066118900?mt=8">https://itunes.apple.com/us/app/joy-ride-taxi-app/id1066118900?mt=8</a>                                                     | It is not clear what the service is                                                                                      |
| RocketMan             | Free             | Information           | Travel              | General       | -                 | -                      | ✓                  | <a href="https://itunes.apple.com/ca/app/rocketman-transit-app/id421781409?mt=8">https://itunes.apple.com/ca/app/rocketman-transit-app/id421781409?mt=8</a>                                               |                                                                                                                          |
| RollWithMe            | Free             | Information           | Travel              | Accessibility | ✓                 | -                      | -                  | <a href="http://rollwithmeapp.com/">http://rollwithmeapp.com/</a>                                                                                                                                         | By invitation only, it is an app according to the website but still being developed; not in App store or Google apps yet |
| Ryde                  | Paid             | Information           | Navigation          | General       | -                 | -                      | -                  | <a href="https://itunes.apple.com/us/app/ryde-always-leave-on-time/id1148636943?mt=8">https://itunes.apple.com/us/app/ryde-always-leave-on-time/id1148636943?mt=8</a>                                     | Driving, public transit                                                                                                  |
| Santander Cycles      | Free             | Service               | Travel              | General       | -                 | -                      | -                  | <a href="https://itunes.apple.com/ca/app/santander-cycles/id974792287?mt=8">https://itunes.apple.com/ca/app/santander-cycles/id974792287?mt=8</a>                                                         | Bicycle sharing                                                                                                          |
| Scot Talk             | Free             | Information           | Navigation          | Accessibility | ✓                 | -                      | -                  | <a href="https://itunes.apple.com/gb/app/scot-talk/id7131367966?mt=8">https://itunes.apple.com/gb/app/scot-talk/id7131367966?mt=8</a>                                                                     | Partially-impaired                                                                                                       |
| Seeing Eye GPS        | Free             | Information           | Navigation          | Accessibility | ✓                 | -                      | ✓                  | <a href="https://itunes.apple.com/us/app/seeing-eye-gps/id668624446?mt=8">https://itunes.apple.com/us/app/seeing-eye-gps/id668624446?mt=8</a>                                                             | Can used for general purpose also, available in different languages                                                      |
| SoBi                  | Free             | Service               | Travel              | General       | -                 | -                      | ✓                  | <a href="https://itunes.apple.com/ca/app/social-bicycles/id641497286?mt=8">https://itunes.apple.com/ca/app/social-bicycles/id641497286?mt=8</a>                                                           | Bicycle sharing                                                                                                          |
| Spinlister            | Free             | Service               |                     | General       | -                 | -                      | ✓                  | <a href="https://play.google.com/store/apps/details?id=spinlister.prod.app&amp;hl=en">https://play.google.com/store/apps/details?id=spinlister.prod.app&amp;hl=en</a>                                     | Peer-to-peer bicycle sharing                                                                                             |
| Stop Announcer        | Free             | Information           | Maps and navigation | General       | ✓                 | -                      | -                  | <a href="https://itunes.apple.com/au/app/stop-announcer-nsw/id1112389512?mt=8">https://itunes.apple.com/au/app/stop-announcer-nsw/id1112389512?mt=8</a>                                                   | Visual impairment                                                                                                        |
| Summon                | Couldn't verify  | Service               | Travel              | General       | -                 | -                      | -                  | <a href="http://www.summon.com/">http://www.summon.com/</a>                                                                                                                                               | Bay area only; asks for phone number to download app                                                                     |
| Tiramisu Transit      | Free             | Information           | Navigation          | General       | ✓                 | -                      | -                  | <a href="https://itunes.apple.com/ca/app/tiramisu/id429707931?mt=8">https://itunes.apple.com/ca/app/tiramisu/id429707931?mt=8</a>                                                                         | Visual and mobility impairment                                                                                           |
| ToGO Carpool          | Free             | Service               | Travel & local      | General       | -                 | ✓                      | Info not available | <a href="https://play.google.com/store/apps/details?id=com.app.togo&amp;hl=en">https://play.google.com/store/apps/details?id=com.app.togo&amp;hl=en</a>                                                   | Peer-to-peer carsharing, on Google Play only - not available on Apple store                                              |
| Trainline UK          | Free             | Information & service | Travel              | General       | -                 | -                      | ✓                  | <a href="https://itunes.apple.com/us/app/trainline-uk/id334235181?mt=8">https://itunes.apple.com/us/app/trainline-uk/id334235181?mt=8</a>                                                                 | Information and service (ticket purchase) is for trains only                                                             |
| Transit               | Free             | Information           | Navigation          | General       | -                 | -                      | ✓                  | <a href="https://itunes.apple.com/ca/app/transit-real-time-app-for-bus-subway-metro/id498151501?mt=8">https://itunes.apple.com/ca/app/transit-real-time-app-for-bus-subway-metro/id498151501?mt=8</a>     |                                                                                                                          |
| Transit Go            | Free             | Service               | Travel              | General       | -                 | -                      | -                  | <a href="https://itunes.apple.com/ca/app/transit-go-ticket/id1131345078?mt=8">https://itunes.apple.com/ca/app/transit-go-ticket/id1131345078?mt=8</a>                                                     | For buying tickets                                                                                                       |
| TripView              | Free             | Information           | Travel              | General       | -                 | -                      | -                  | <a href="https://itunes.apple.com/ca/app/tripview-sydney-melbourne/id294730339?mt=8">https://itunes.apple.com/ca/app/tripview-sydney-melbourne/id294730339?mt=8</a>                                       |                                                                                                                          |
| TripGo                | Free             | Information           | Maps and navigation | General       | ✓                 | -                      | ✓                  | <a href="https://itunes.apple.com/app/apple-store/id533630842?mt=8">https://itunes.apple.com/app/apple-store/id533630842?mt=8</a>                                                                         | With wheelchair information enabled                                                                                      |
| Triptastic            | Free             | Information           | Navigation          | General       | ✓                 | -                      | ✓                  | <a href="https://itunes.apple.com/au/app/triptastic/id601936596?mt=8">https://itunes.apple.com/au/app/triptastic/id601936596?mt=8</a>                                                                     | Accessibility information                                                                                                |
| London Tube Map       | Free             | Information           | Navigation and      | General       | -                 | -                      | ✓                  | <a href="https://itunes.apple.com/us/app/london-tube-map/id325442036?mt=8">https://itunes.apple.com/us/app/london-tube-map/id325442036?mt=8</a>                                                           |                                                                                                                          |
| Turo                  | Free             | Service               | Travel              | General       | -                 | ✓                      | ✓                  | <a href="https://itunes.apple.com/us/app/turo-rent-better-cars/id555063314?mt=8">https://itunes.apple.com/us/app/turo-rent-better-cars/id555063314?mt=8</a>                                               | English, French; peer-to-peer car rental                                                                                 |
| Uber                  | Free             | Service               | Travel              | General       | ✓                 | ✓                      | ✓                  | <a href="https://itunes.apple.com/ca/app/uber/id368677368?mt=8">https://itunes.apple.com/ca/app/uber/id368677368?mt=8</a>                                                                                 | Economy rate, accessibility to visual and mobility impairment                                                            |
| Via                   | Free             | Service               | Travel              | General       | -                 | -                      | ✓                  | <a href="https://ridewithvia.com/">https://ridewithvia.com/</a> <a href="https://itunes.apple.com/au/app/ridewithvia/id1066118900?mt=8">https://itunes.apple.com/au/app/ridewithvia/id1066118900?mt=8</a> | Description mentions "affordable"                                                                                        |
| Waze                  | Free             | Information           | Navigation          | General       | -                 | -                      | ✓                  | <a href="https://itunes.apple.com/us/developer/waze-inc/id323229109">https://itunes.apple.com/us/developer/waze-inc/id323229109</a>                                                                       |                                                                                                                          |

| Smartphone App | App Availability | Provision Type | Category   | Main Use      | Assistive Feature | Cost-conscious Feature | Language Options | App Download Site                                                                                                                   | Miscellaneous Notes                |
|----------------|------------------|----------------|------------|---------------|-------------------|------------------------|------------------|-------------------------------------------------------------------------------------------------------------------------------------|------------------------------------|
| Waze Carpool   | Free             | Service        | Carpool    | General       | -                 | ✓                      | ✓                | <a href="https://itunes.apple.com/app/apple-store/id1091029104?mt=8">https://itunes.apple.com/app/apple-store/id1091029104?mt=8</a> | Currently in California and Israel |
| Wheely         | Free             | Information    | Navigation | Accessibility | ✓                 | -                      | ✓                | <a href="https://itunes.apple.com/us/app/wheely/id380732645?mt=8">https://itunes.apple.com/us/app/wheely/id380732645?mt=8</a>       | English and Russian                |
| ZipCar         | Free             | Service        | Travel     | General       | -                 | -                      | ✓                | <a href="https://itunes.apple.com/ca/app/zipcar/id329384702?mt=8">https://itunes.apple.com/ca/app/zipcar/id329384702?mt=8</a>       | Carsharing service                 |

Table 1: Collected data (as of September 2017)
